# Supplementary material for: Synthesis of cryptomelane type α-MnO2(KxMn8O16) cathode materials with tunable K+content: the role of tunnel cation concentration on electrochemistry
Source: Royal Society of Chemistry journal article supplement (doi:10.1039/c7ta03476h), 2017-01-01
Supplement: c7ta03476h1.pdf [file c7ta03476h1.pdf]

### Supplementary Information

#### Synthesis of Cryptomelane Type $\alpha$ -MnO<sub>2</sub> (K<sub>x</sub>Mn<sub>8</sub>O<sub>16</sub>) Cathode Materials with Tunable K<sup>+</sup> content: The Role of Tunnel Cation Concentration on Electrochemistry

Altug S. Poyraz<sup>a</sup>, Jianping Huang<sup>b</sup>, Christopher Pelliccione<sup>a</sup>, Xiao Tong,<sup>a</sup> Shaobo Cheng,<sup>a,c</sup> Lijun Wu,<sup>a</sup> Yimei Zhu,<sup>a</sup> Amy C. Marschilok<sup>b,d\*</sup>, Kenneth J. Takeuchi<sup>b,d\*</sup>, and Esther S. Takeuchi<sup>a,b,d\*</sup>

<sup>a</sup> Energy Sciences Directorate, Brookhaven National Laboratory, Upton, NY 11973, USA.

<sup>b</sup> Department of Chemistry, Stony Brook University, Stony Brook, NY 11794, USA.

<sup>c</sup> Department of Materials Science and Engineering, Tsinghua University, Beijing, 100084, China.

<sup>d</sup> Department of Materials Science and Engineering, Stony Brook University, Stony Brook, NY 11794, USA.

\* Corresponding Authors: (ACM) [amy.marschilok@stonybrook.edu](mailto:amy.marschilok@stonybrook.edu), (KJT) [kenneth.takeuchi.1@stonybrook.edu](mailto:kenneth.takeuchi.1@stonybrook.edu), (EST) [esther.takeuchi@stonybrook.edu](mailto:esther.takeuchi@stonybrook.edu)

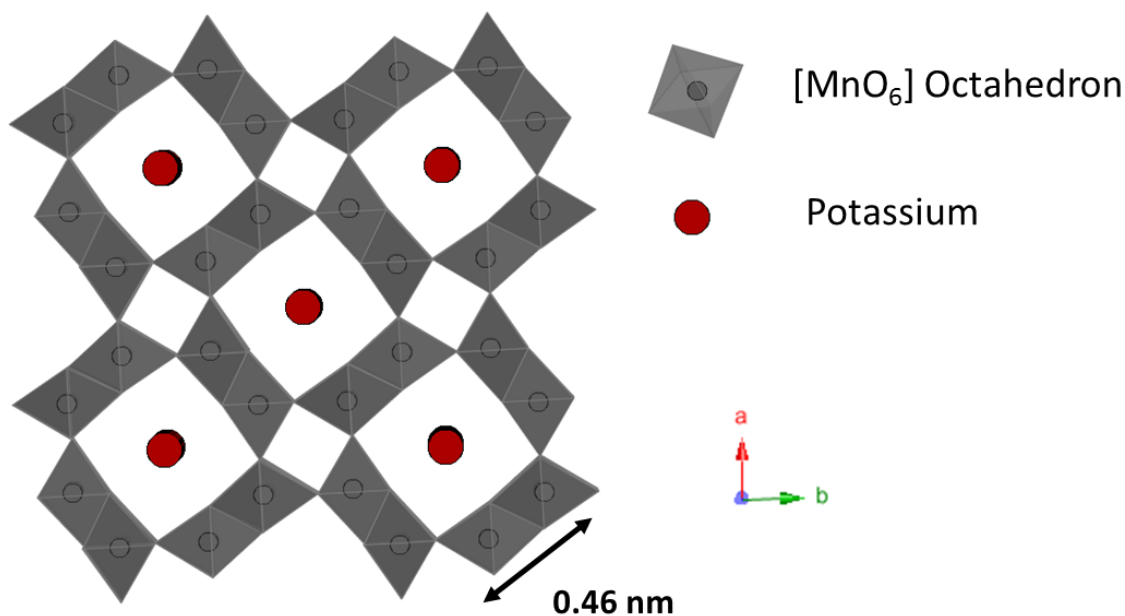

Fig. S1 Schematic structural representation of 2 x 2 (0.46 x 0.46 nm) cryptomelane type manganese dioxide (K<sub>x</sub>Mn<sub>8</sub>O<sub>16</sub>,  $\alpha$ -MnO<sub>2</sub>) with space group of I4/m. The structure is along the c axis. Red spheres represent potassium and gray polyhedra represent MnO<sub>6</sub> octahedral units.

Table S1 Lattice Parameters of Potassium ion free and Potassium ion containing  $\text{Mn}_8\text{O}_{16}$  ( $\alpha$ - $\text{MnO}_2$  structured) materials from literature

| Reference                   | Composition                                                            | a (Å)     | c (Å)      | Volume (Å <sup>3</sup> ) |
|-----------------------------|------------------------------------------------------------------------|-----------|------------|--------------------------|
| Yang et al. <sup>1</sup>    | $\text{Mn}_8\text{O}_{16} \cdot 1.36\text{H}_2\text{O}$                | 9.7914    | 2.8633     | 274.51                   |
|                             | $\text{Mn}_8\text{O}_{16} \cdot 0.88\text{H}_2\text{O}$                | 9.7732    | 2.8639     | 273.56                   |
| Kijima et al. <sup>2</sup>  | $\text{Mn}_8\text{O}_{16} \cdot \text{XH}_2\text{O}$                   | 9.805(4)  | 2.8510(13) | 274.65                   |
| Johnson et al. <sup>3</sup> | $\text{Mn}_8\text{O}_{16} \cdot 2 \cdot 64\text{H}_2\text{O}$          | 9.814(3)  | 2.850(1)   | 274.5                    |
| Johnson et al. <sup>3</sup> | $\text{Mn}_8\text{O}_{16} \cdot 2 \cdot 0\text{H}_2\text{O}$           | 9.8107(8) | 2.8502(5)  | 274.33                   |
|                             | Dehydrated $\text{Mn}_8\text{O}_{16}$                                  | 9.7502(9) | 2.8607(6)  | 271.96                   |
| Gao et al. <sup>4</sup>     | $\text{K}_{0.88}\text{Mn}_8\text{O}_{16} \cdot 0.4\text{H}_2\text{O}$  | 9.8241(5) | 2.8523(1)  | 275.28                   |
| Kadoma et al. <sup>5</sup>  | $\text{K}_{1.12}\text{Mn}_8\text{O}_{16} \cdot 1.2\text{H}_2\text{O}$  | 9.77(5)   | 2.85(6)    | 272.(9)                  |
|                             | $\text{K}_{1.12}\text{Mn}_8\text{O}_{16} \cdot 0.32\text{H}_2\text{O}$ | 9.78(0)   | 2.85(4)    | 273.(0)                  |
|                             | $\text{K}_{1.12}\text{Mn}_8\text{O}_{16} \cdot 0.0\text{H}_2\text{O}$  | 9.75(6)   | 2.85(6)    | 271.(8)                  |

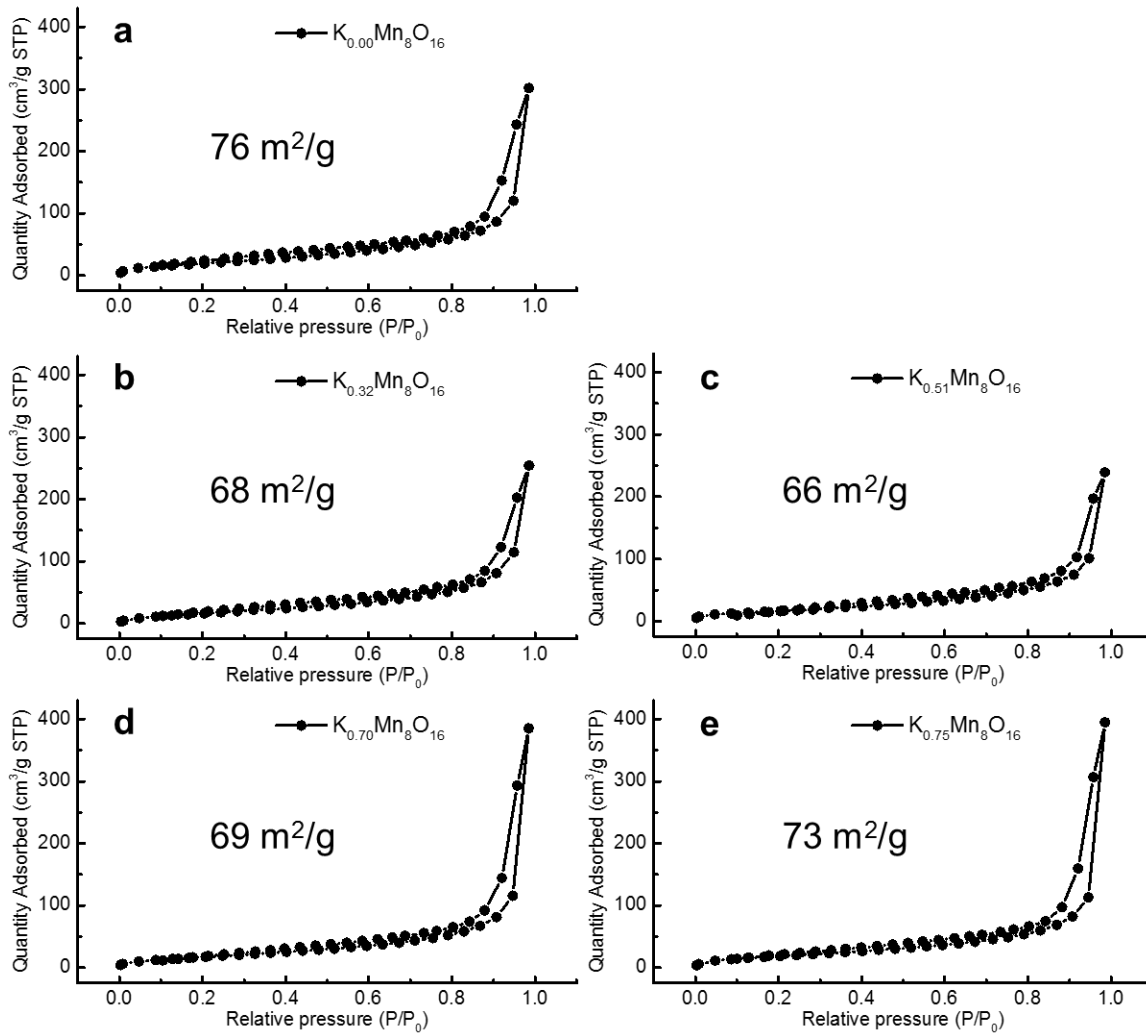

Fig. S2 Nitrogen adsorption-desorption isotherms of  $K_xMn_8O_{16}$  samples, where  $x = 0.00, 0.32, 0.51, 0.70,$  and  $0.75$ .

Table S2 Parameters from Rietveld refinement for  $K_{0.00}Mn_8O_{16}$ ,  $K_{0.32}Mn_8O_{16}$ , and  $K_{0.75}Mn_8O_{16}$  samples. Wyckoff positions and Mn-O distances and angles. Debye-Waller factors are shown as Biso values

|                      |             |                |           |           |          |             |
|----------------------|-------------|----------------|-----------|-----------|----------|-------------|
| $K_{0.00}Mn_8O_{16}$ | <b>Atom</b> | <b>Wyckoff</b> | <b>X</b>  | <b>Y</b>  | <b>Z</b> | <b>Biso</b> |
|                      | Mn          | 8h             | 0.3546(3) | 0.1704(2) | 0        | 0.0046(7)   |
|                      | O1          | 8h             | 0.1391(9) | 0.1959(6) | 0        | 0.006(3)    |
|                      | O2          | 8h             | 0.185(1)  | 0.475(1)  | 0        | 0.018(3)    |
| $K_{0.32}Mn_8O_{16}$ | <b>Atom</b> | <b>Wyckoff</b> | <b>x</b>  | <b>y</b>  | <b>z</b> | <b>Biso</b> |
|                      | K           | 4e             | 0         | 0         | 0.40(2)  | 0.03(3)     |
|                      | Mn          | 8h             | 0.3520(3) | 0.1686(3) | 0        | 0.0079(6)   |
|                      | O1          | 8h             | 0.1420(9) | 0.2018(6) | 0        | 0.013(3)    |
|                      | O2          | 8h             | 0.531(1)  | 0.1834(8) | 0        | 0.014(3)    |
| $K_{0.75}Mn_8O_{16}$ | <b>Atom</b> | <b>Wyckoff</b> | <b>x</b>  | <b>y</b>  | <b>z</b> | <b>Biso</b> |
|                      | K           | 4e             | 0         | 0         | 0.44(1)  | 0.027(9)    |
|                      | Mn          | 8h             | 0.3509(2) | 0.1675(2) | 0        | 0.0083(5)   |
|                      | O1          | 8h             | 0.1497(8) | 0.2035(5) | 0        | 0.016(2)    |
|                      | O2          | 8h             | 0.5370(9) | 0.1766(7) | 0        | 0.014(2)    |

|                      | <b>Mn-O Bond Distances (Å)</b>                      |                                                     |                                                     |
|----------------------|-----------------------------------------------------|-----------------------------------------------------|-----------------------------------------------------|
|                      | <b>K<sub>0.00</sub>Mn<sub>8</sub>O<sub>16</sub></b> | <b>K<sub>0.32</sub>Mn<sub>8</sub>O<sub>16</sub></b> | <b>K<sub>0.75</sub>Mn<sub>8</sub>O<sub>16</sub></b> |
| <b>O1</b>            | 2.127                                               | 2.089                                               | 2.008                                               |
| <b>O2</b>            | 1.941                                               | 1.916                                               | 1.909                                               |
| <b>O3</b>            | 1.941                                               | 1.916                                               | 1.909                                               |
| <b>O4</b>            | 2.056                                               | 2.001                                               | 1.938                                               |
| <b>O5</b>            | 2.056                                               | 2.001                                               | 1.938                                               |
| <b>O6</b>            | 1.675                                               | 1.761                                               | 1.83                                                |
| <b>Average Mn-O</b>  | 1.966                                               | 1.947                                               | 1.922                                               |
| <b>Minimum Angle</b> | 84.965                                              | 85.083                                              | 83.12                                               |
| <b>Maximum Angle</b> | 104.112                                             | 103.254                                             | 99.868                                              |

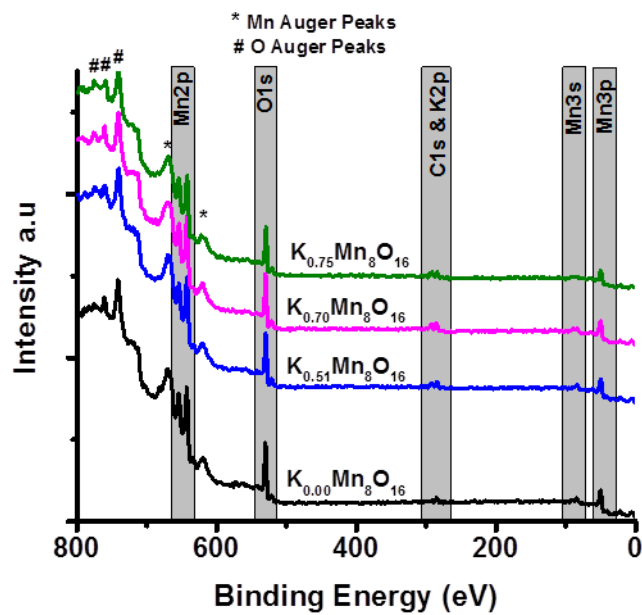

Fig. S3 X-ray Photoelectron (XPS) survey spectra of  $K_xMn_8O_{16}$  samples, where  $X = 0.00, 0.51, 0.70,$  and  $0.75$ .

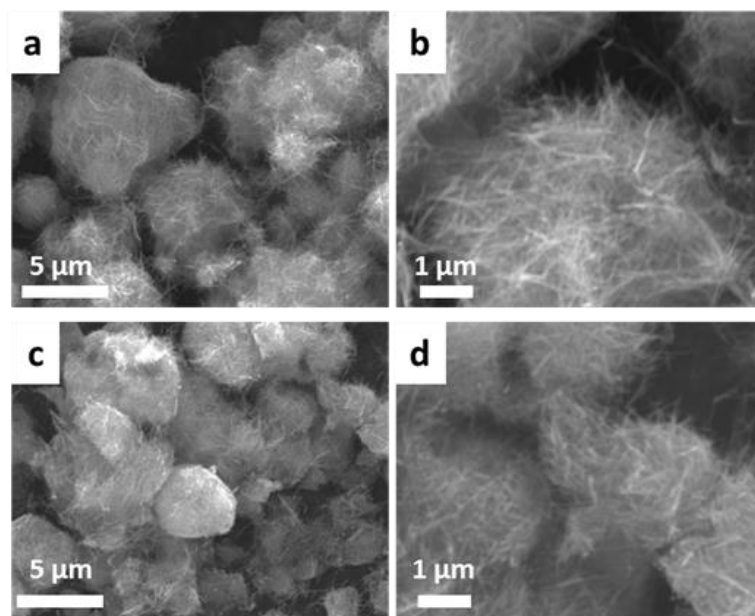

Fig. S4 SEM Images of (a), (b)  $K_{0.51}Mn_8O_{16}$  (c), (d)  $K_{0.70}Mn_8O_{16}$ . The images were recorded at two different magnifications: (a), (c), (e) were at 5kX and (b), (d), (f) were at 15kX.

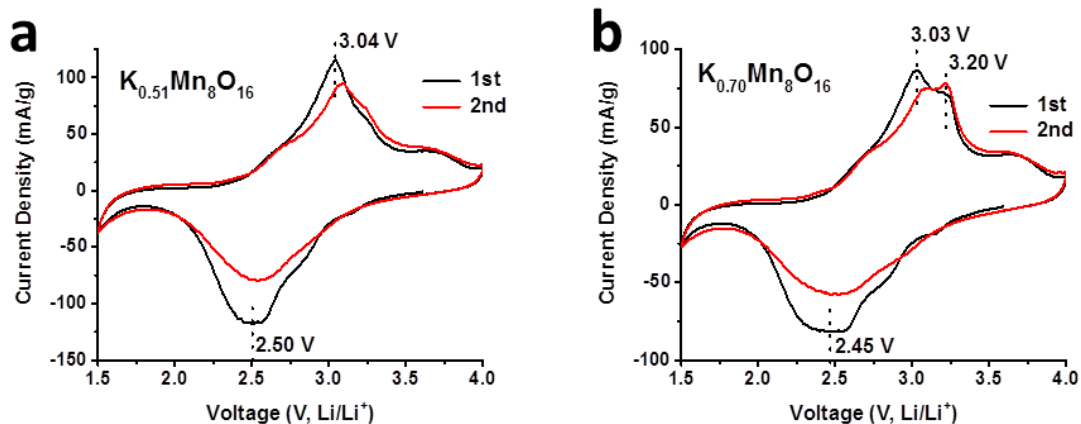

Fig. S5 Cyclic Voltammetry of (a)  $K_{0.51}Mn_8O_{16}$  and (b)  $K_{0.70}Mn_8O_{16}$ . Scan rate is 0.1 mV/s.

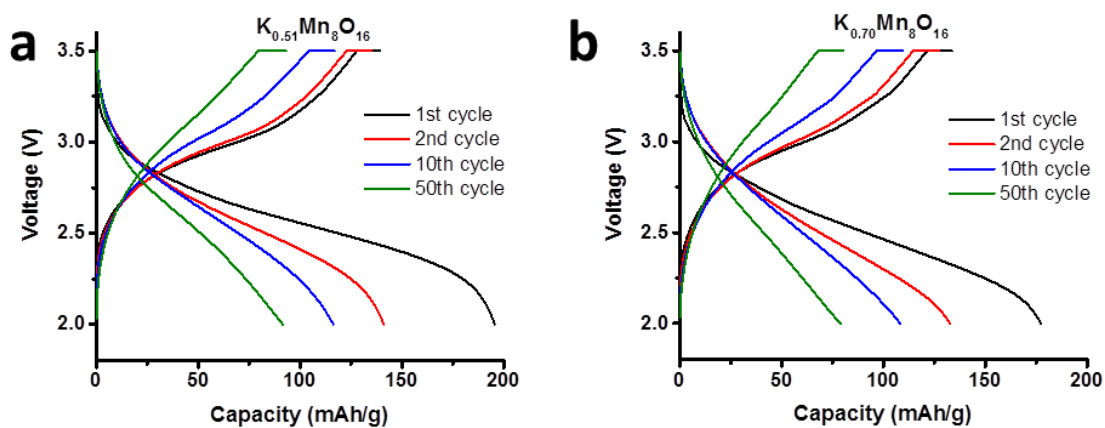

Fig. S6 Representative discharge profiles at cycles 1, 2, 10, and 50 were shown at (a) for  $K_{0.51}Mn_8O_{16}$  and (b) for  $K_{0.70}Mn_8O_{16}$ . The cells were discharged-charged at a rate of 50mA/g.

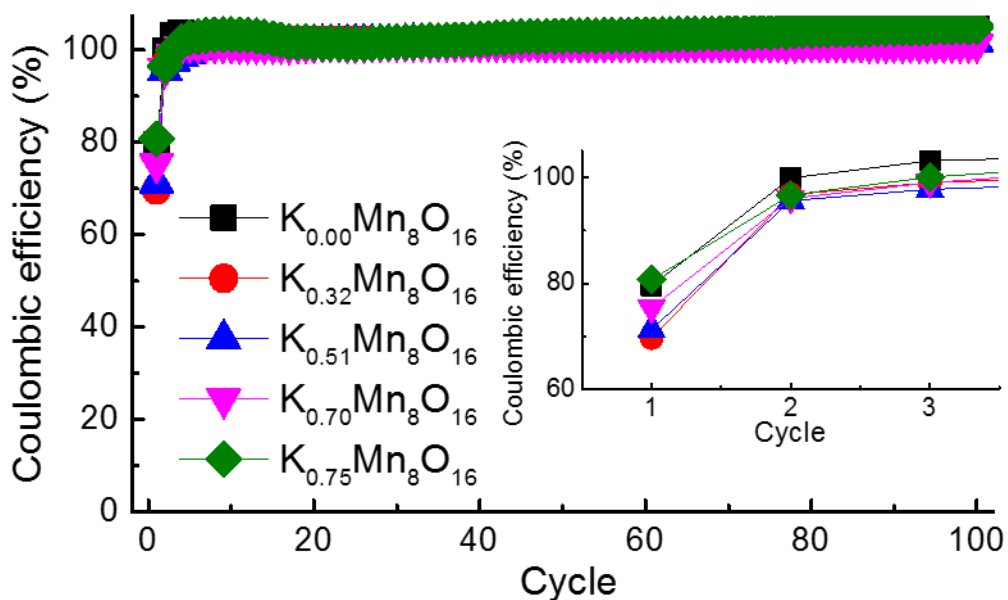

Fig. S7 Coulombic efficiency of  $K_xMn_8O_{16}$  samples with varying  $K^+$  content where X = 0.00, 0.32, 0.51, 0.70, and 0.75.

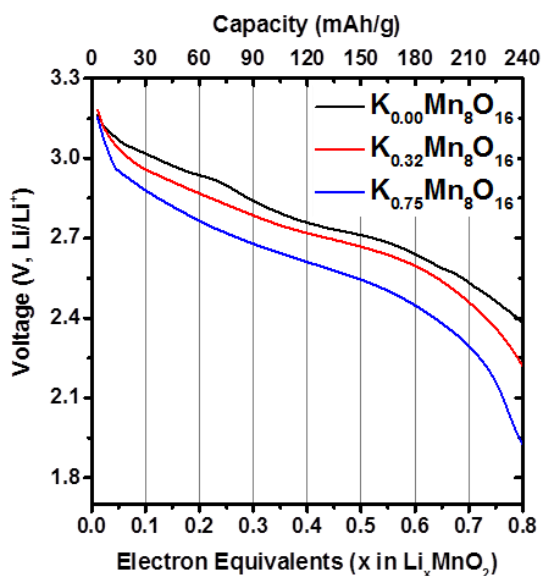

Fig. S8 Open circuit voltage (OCV) plots of  $K_{0.00}Mn_8O_{16}$ ,  $K_{0.32}Mn_8O_{16}$ , and  $K_{0.75}Mn_8O_{16}$ . OCVs were recorded at the end of rest period of GITT plots. 100mA/g pulse current for 2 min followed by 5h rest between the pulses.



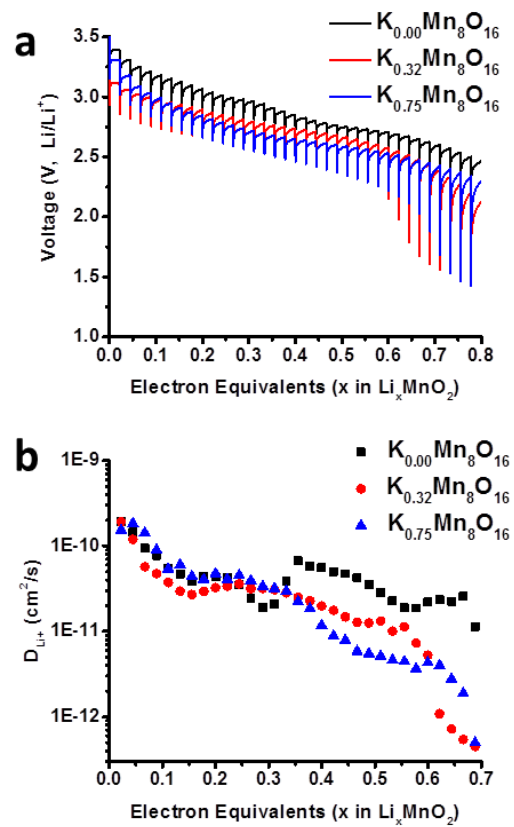

Fig. S9 (a) Galvanostatic Intermittent Titration Technique (GITT) plots and (b) Diffusion coefficient plots of  $K_{0.00}Mn_8O_{16}$ ,  $K_{0.32}Mn_8O_{16}$ , and  $K_{0.75}Mn_8O_{16}$ . 40mA/g pulse current for 10 min followed by 12h rest between the pulses.

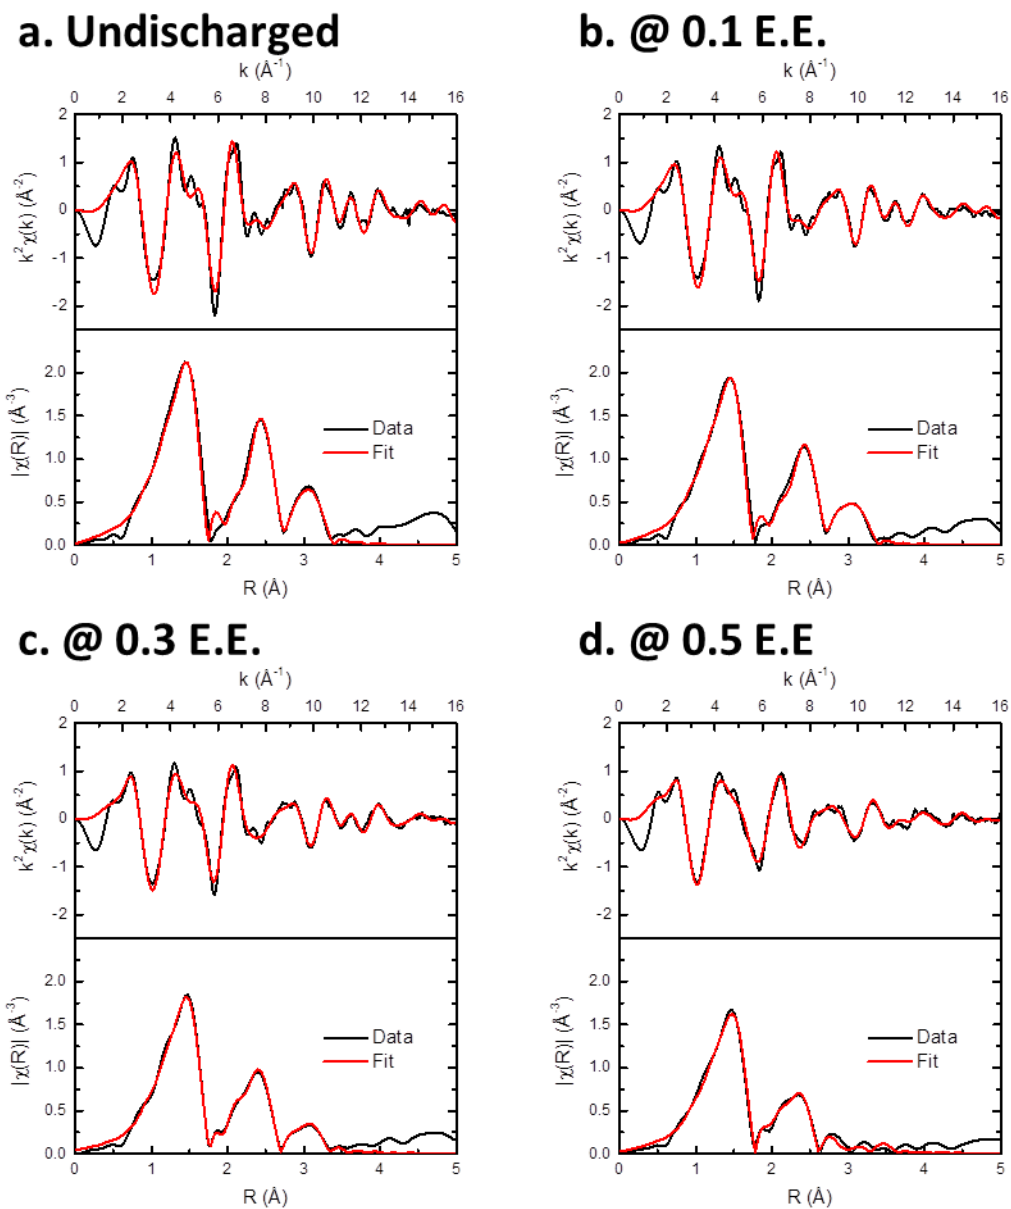

Fig. S10 EXAFS k-space and fitted r-space spectra for  $\text{K}_{0.00}\text{Mn}_8\text{O}_{16}$  at 0 (undischarged), 0.1, 0.3, and 0.5 lithiation levels (Electron equivalents per  $\text{MnO}_2$ ). Electron equivalent numbers are reported in per  $\text{MnO}_2$  unit.

### a. Undischarged

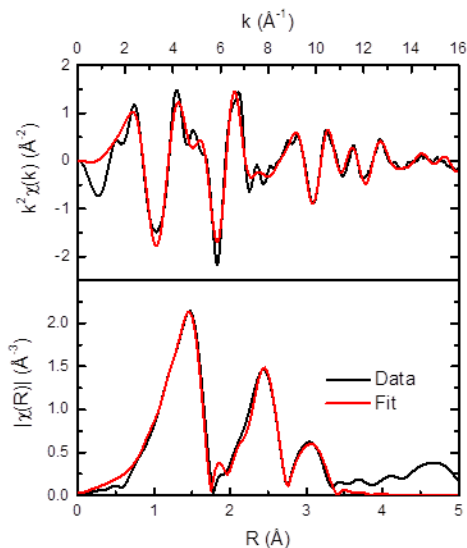

### b. @ 0.1 E.E

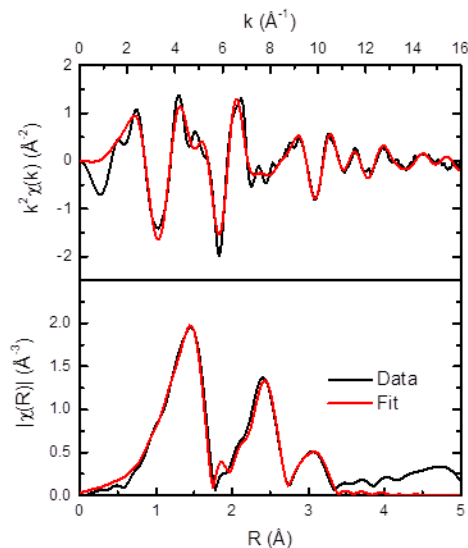

### c. @ 0.3 E.E

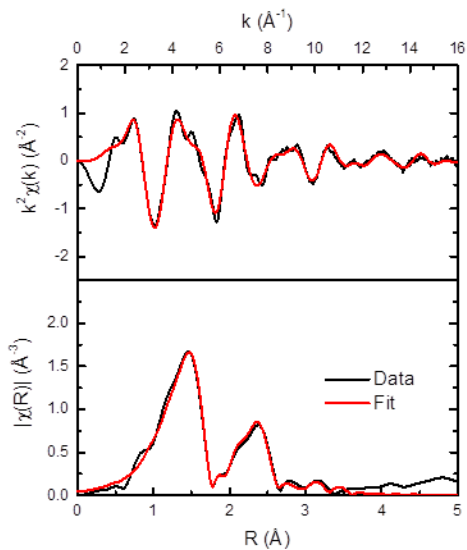

### d. @ 0.5 E.E

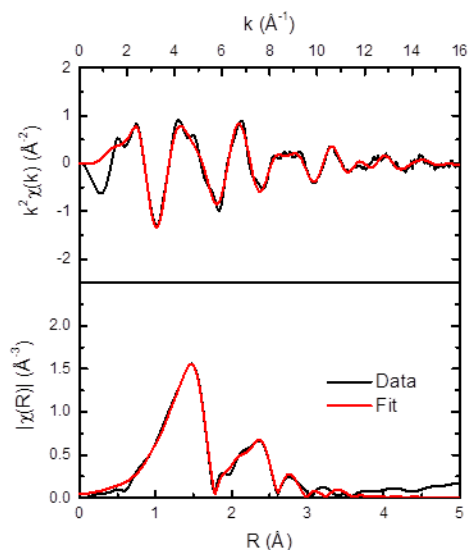

Fig. S11 EXAFS  $k$ -space and fitted  $r$ -space spectra for  $\text{K}_{0.32}\text{Mn}_8\text{O}_{16}$  at 0 (undischarged), 0.1, 0.3, and 0.5 lithiation levels (Electron equivalents per  $\text{MnO}_2$ ). Electron equivalent numbers are reported in per  $\text{MnO}_2$  unit.

**a. Undischarged**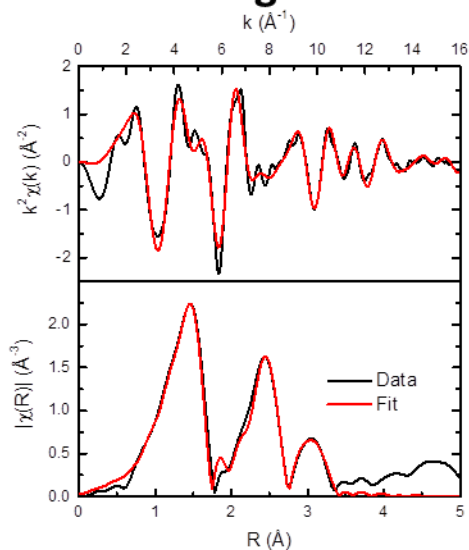**b. @ 0.1 E.E.**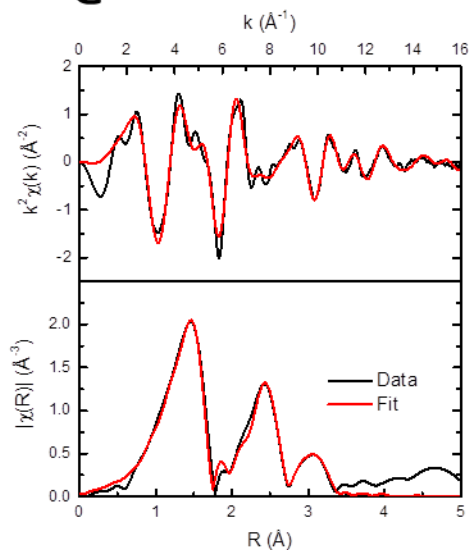**c. @ 0.3 E.E.**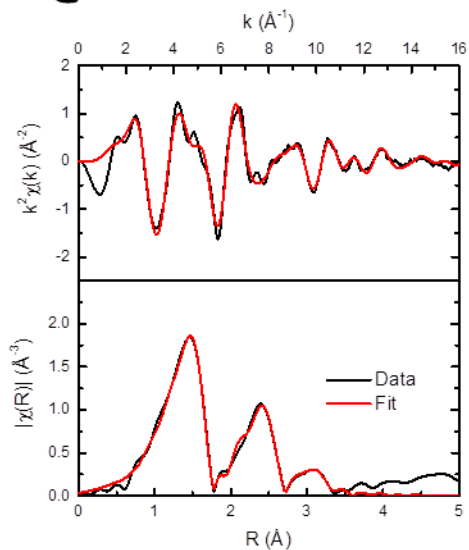**d. @ 0.5 E.E.**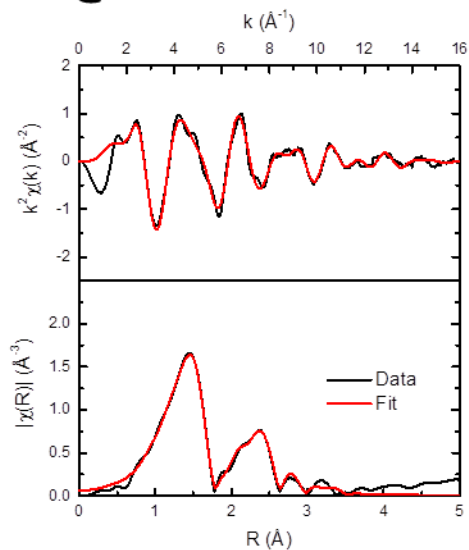

Fig. S12 EXAFS  $k$ -space and fitted  $r$ -space spectra for  $\text{K}_{0.75}\text{Mn}_8\text{O}_{16}$  at 0 (undischarged), 0.1, 0.3, and 0.5 lithiation levels (Electron equivalents per  $\text{MnO}_2$ ). Electron equivalent numbers are reported in per  $\text{MnO}_2$  unit.

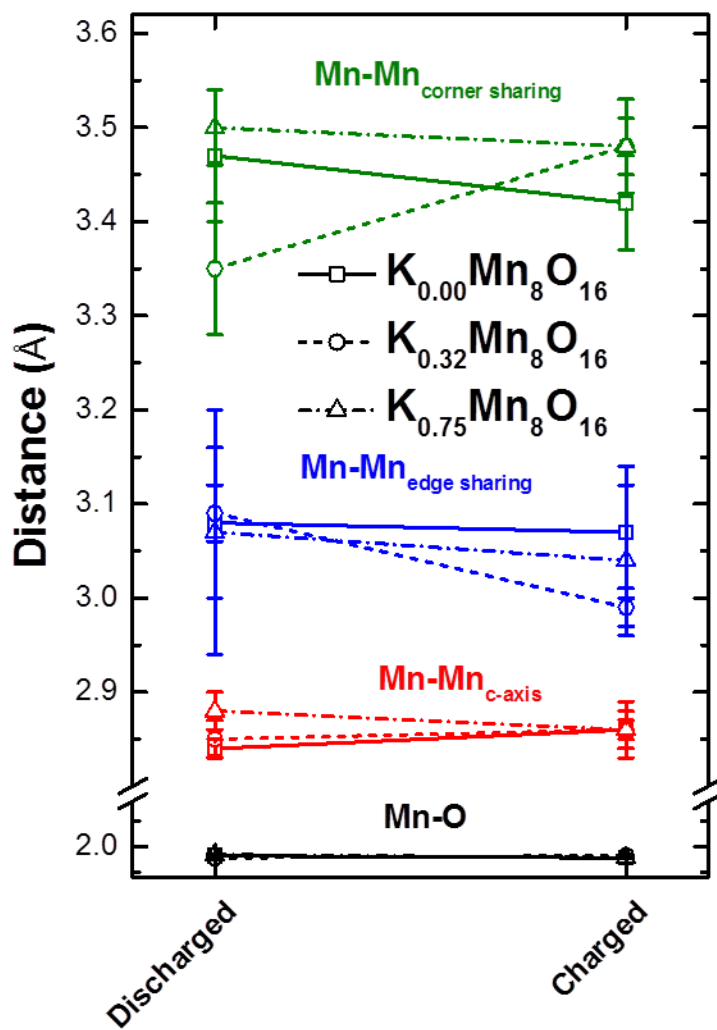

Fig. S13 EXAFS interatomic distance modeling results for  $K_{0.00}Mn_8O_{16}$ ,  $K_{0.32}Mn_8O_{16}$ , and  $K_{0.75}Mn_8O_{16}$  after 50 cycles and at discharged and charged states. Mn-O (black lines) Mn-Mn<sub>c-axis</sub> (red), Mn-Mn<sub>edge sharing</sub> and Mn-Mn<sub>corner sharing</sub> are displayed.

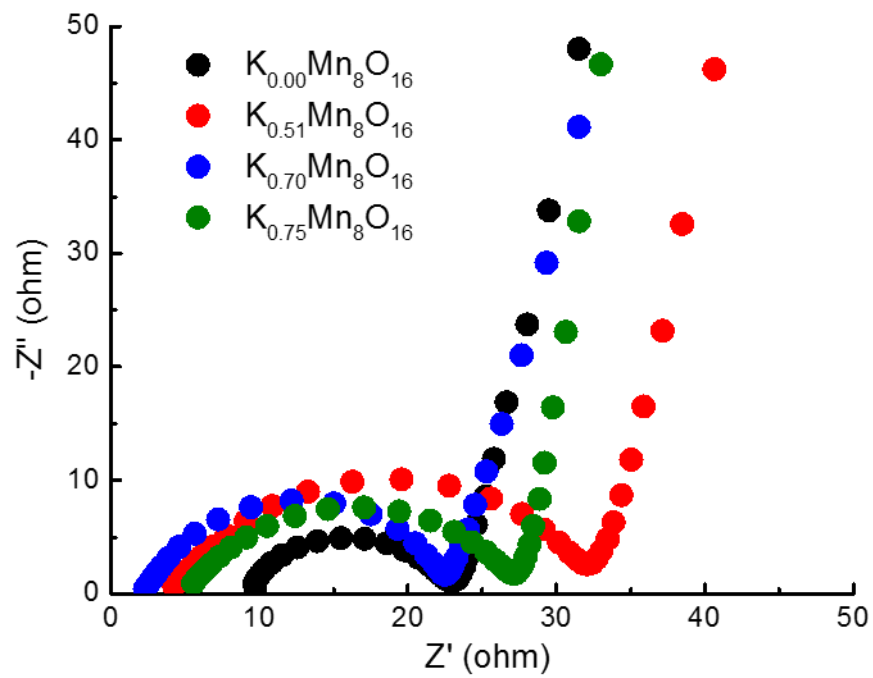

Fig. S14 AC impedance data of  $K_xMn_8O_{16}$  samples before discharge.

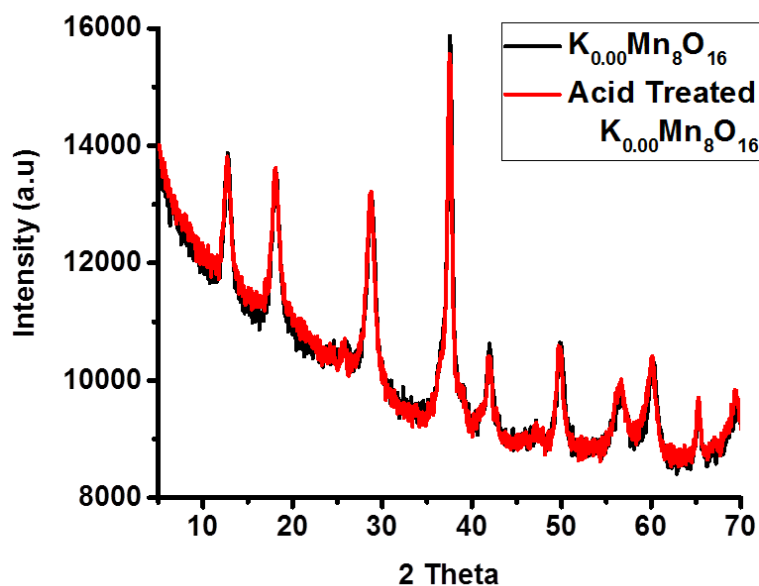

Fig. S15 Powder X-ray diffraction (PXRD) patterns of cation free  $K_{0.00}Mn_8O_{16}$  and Acid Treated  $K_{0.00}Mn_8O_{16}$ . Acid treatment was produced by refluxing  $K_{0.00}Mn_8O_{16}$  in 1M  $HNO_3$  at  $60^\circ C$  for 72h followed by a heat treatment at  $280^\circ C$ .

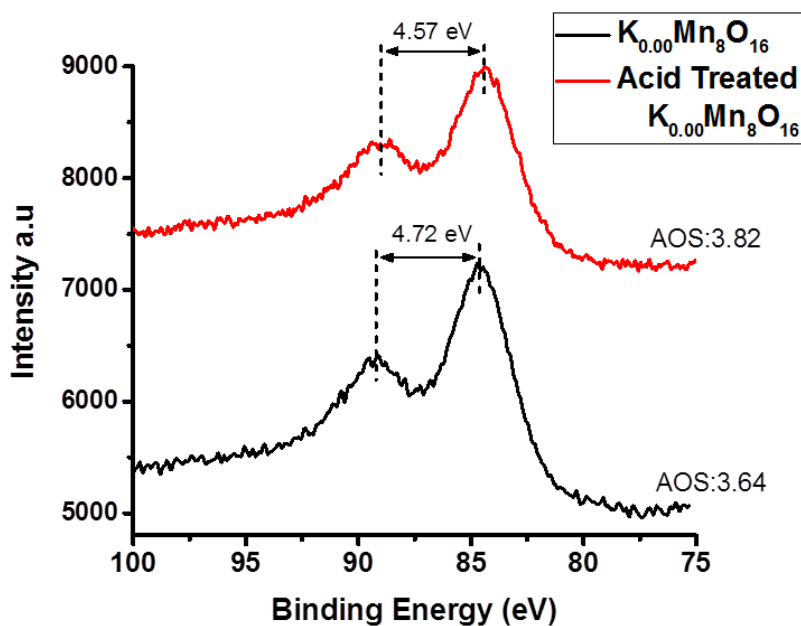

Fig. S16 Mn3s X-ray Photoelectron spectra (XPS) of  $K_{0.00}Mn_8O_{16}$  and Acid Treated  $K_{0.00}Mn_8O_{16}$  and calculated average oxidation states (AOS) of manganese in these samples,  $AOS = 8.956 - 1.126 \times \Delta E(3s)$ .

## References

1. Z. Yang, L. Trahey, Y. Ren, M. K. Chan, C. Lin, J. Okasinski and M. M. Thackeray, *Journal of Materials Chemistry A*, 2015, **3**, 7389-7398.
2. N. Kijima, H. Yasuda, T. Sato and Y. Yoshimura, *Journal of Solid State Chemistry*, 2001, **159**, 94-102.
3. C. Johnson and M. Thackeray, *Journal of Power Sources*, 2001, **97**, 437-442.
4. T. Gao, M. Glerup, F. Krumeich, R. Nesper, H. Fjellvåg and P. Norby, *The Journal of Physical Chemistry C*, 2008, **112**, 13134-13140.
5. Y. Kadoma, S. Oshitari, K. Ui and N. Kumagai, *Electrochimica Acta*, 2007, **53**, 1697-1702.
